# Supplementary material for: Intra-Arterial TheraSphere Yttrium-90 Glass Microspheres in the Treatment of Patients With Unresectable Hepatocellular Carcinoma: Protocol for the STOP-HCC Phase 3 Randomized Controlled Trial
Source: PubMed Central journal article supplement (PMC6115595; doi:10.2196/11234), 2018-08-15
Supplement: resprot_v7i8e11234_app1.pdf [file resprot_v7i8e11234_app1.pdf]

---

**Institutional Review Board Office**

**Northwestern University**

Biomedical IRB  
750 North Lake Shore Drive  
Suite 700  
Chicago, Illinois 60611  
312-503-9338

Social and Behavioral Sciences IRB  
2205 Tech Drive  
Hogan Bldg. Suite G-100  
Evanston, Illinois 60208  
847-467-1723

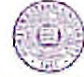

**NORTHWESTERN  
UNIVERSITY**

2/13/2012

[Dr. Laura Kulik](#)  
Physician  
[Medicine](#)

Chicago, IL 60607  
[lkulik@nmff.org](mailto:lkulik@nmff.org)

**IRB Project Number:** STU00059691

**Project Title:** DRUG TS-103: A Phase III Clinical Trial of Intra-arterial TheraSphere® in the Treatment of Patients with Unresectable Hepatocellular Carcinoma (HCC)

**Project Sites:**

[Northwestern Medical Faculty Foundation \(NMFF\)](#)

\* [Robert H. Lurie Comprehensive Cancer Center](#)

[Northwestern University \(NU\)](#)

[Northwestern Memorial Hospital \(NMH\)](#)

**Sponsor Information (Grant #, if applicable):**

[View Other \(Industry Sponsored\)](#)

**Submission Considered:** New Submission **Submission Number:** STU00059691

**Study Review Type:** Full IRB Review

**Meeting Date** 2/10/2012

**Panel:** Panel C

**Status:** APPROVED **Approval Period:** (2/10/2012 - 2/9/2013)

Dear Dr. Kulik,

The IRB considered and approved your submission referenced above through 2/9/2013 . As Principal Investigator (P.I.), you have ultimate responsibility for the conduct of this study, the ethical performance of the project, and the protection of the rights and welfare of human subjects. You are required to comply with all NU policies and procedures, as well as with all applicable Federal, State and local laws regarding the protection of human subjects in research including, but not limited to the following:

- Not changing the approved protocol or consent form without prior IRB approval (except in an emergency, if necessary, to safeguard the well-being of human subjects).
- Obtaining proper informed consent from human subjects or their legally responsible representative,

using only the currently approved, stamped consent form.

- Promptly reporting unanticipated problems involving risks to subjects or others, or promptly reportable non-compliance in accordance with IRB guidelines.
- Submit a continuing review application 45 days prior to the expiration of IRB approval. If IRB re-approval is not obtained by the end of the approval period indicated above, all research related activities must stop and no new subjects may be enrolled.

**IRB approval includes the following:**

**Written Consent Form/Consent Form and Authorization for Research:**

Name

[DRUG TS-103 ICF dated 12.05.11.doc](#)

**Protocol Document:**

Name

[DRUG TS-103 Protocol version 1.0 dated 03.09.11.pdf](#)

**Recruitment Materials:**

Name

[DRUG TS103 website abstract](#)

**Survey/Questionnaires:**

Name

[DRUG TS-103 FACT-Hep Questionnaire.pdf](#)

---

For more information regarding IRB Office submissions and guidelines, please consult <http://www.northwestern.edu/research/OPRS/irb>.  
This Institution has an approved Federalwide Assurance with the Department of Health and Human Services: FWA00001549.
